# Supplementary material for: Production of functional spherical particles with porous hollow structures in water via oiling-out directional agglomeration
Source: Royal Society of Chemistry journal article supplement (doi:10.1039/d3gc02370b), 2023-01-01
Supplement: d3gc02370b1.pdf [file d3gc02370b1.pdf]

## Supporting Information

### Production of Functional Spherical Particles with Porous Hollow Structures in Water via Oiling-Out Directional Agglomeration

Yanbo Liu<sup>a,b</sup>, Maolin Li<sup>a,b</sup>, Jiawei Lin<sup>a,b</sup>, Xuemei Wei<sup>d</sup>, Guoqi Yu<sup>d</sup>, Kangli Li<sup>a,c</sup>, Runpu Shen<sup>d</sup>,  
Mingyang Chen<sup>a,b,c\*</sup>, Ling Zhou<sup>a\*</sup>, Junbo Gong<sup>a,b,c</sup>

<sup>a</sup> State Key Laboratory of Chemical Engineering, School of Chemical Engineering and  
Technology, Tianjin University, Tianjin 300072, People's Republic of China

<sup>b</sup> Haihe Laboratory of Sustainable Chemical Transformations, Tianjin 300192 (China)

<sup>c</sup> Zhejiang Institute of Tianjin University, Shaoxing, Zhejiang 312300, People's Republic of  
China

<sup>d</sup> Zhejiang Engineering Research Center of Fat-soluble Vitamin, Shaoxing University, Shaoxing,  
Zhejiang 312000, People's Republic of China

Corresponding Author

\*Tel.: + 86-22-27405754. Fax: + 86-22-27314971. E-mail: [chenmingyang@tju.edu.cn](mailto:chenmingyang@tju.edu.cn).

\*Tel.: + 86-22-27405754. Fax: + 86-22-27314971. E-mail: [zhouling@tju.edu.cn](mailto:zhouling@tju.edu.cn).

## 1 General information

**Table S1.** Experimental conditions for the preparation of spherical products by oiling-out directional agglomeration method.

| Serial<br>number | $m_1$ (g) | $m_2$ (g) | $m_3$ (g) | $m_4$ (g) | $T_1$ (°C) | $T_2$ (°C) | Stirring<br>speed<br>(rpm) | $T_3$ (°C) | Drying<br>time (h) |
|------------------|-----------|-----------|-----------|-----------|------------|------------|----------------------------|------------|--------------------|
| 1                | 50        | 1.0       | 0.3       | 0         | 65         | 2          | 550                        | 40/50      | 45                 |
| 2                | 50        | 1.0       | 0.5       | 0         | 70         | 2          | 550                        | 40/50      | 45                 |
| 3                | 50        | 1.0       | 0.5       | 0         | 70         | 2          | 650                        | 40/50      | 45                 |
| 4                | 50        | 1.0       | 0.5       | 0         | 70         | 2          | 750                        | 40/50      | 45                 |
| 5                | 50        | 1.0       | 0.6       | 0         | 75         | 2          | 550                        | 40/50      | 45                 |
| 6                | 50        | 1.0       | 0.7       | 0         | 80         | 2          | 550                        | 40/50      | 45                 |
| 7                | 50        | 1.0       | 0.5       | 0.1       | 80         | 2          | 550                        | 40/50      | 45                 |
| 8                | 50        | 1.0       | 0.5       | 0.1       | 80         | 2          | 650                        | 40/50      | 45                 |
| 9                | 50        | 1.0       | 0.5       | 0.1       | 80         | 2          | 750                        | 40/50      | 45                 |
| 10               | 50        | 1.0       | 0.5       | 0.1       | 80         | 2          | 850                        | 40/50      | 45                 |
| 11               | 50        | 1.0       | 0.5       | 0.1       | 80         | 2          | 950                        | 40/50      | 45                 |

$m_1$ ,  $m_2$ ,  $m_3$  and  $m_4$  represent the masses of water, L-menthol, indomethacin and nifedipine respectively during the preparation.

$T_1$  and  $T_2$  indicate the heating and quenching temperatures respectively.  $T_3$  denotes the temperature required for drying and in this study both the first stage of 40 °C and then the second stage of 50 °C process was used.

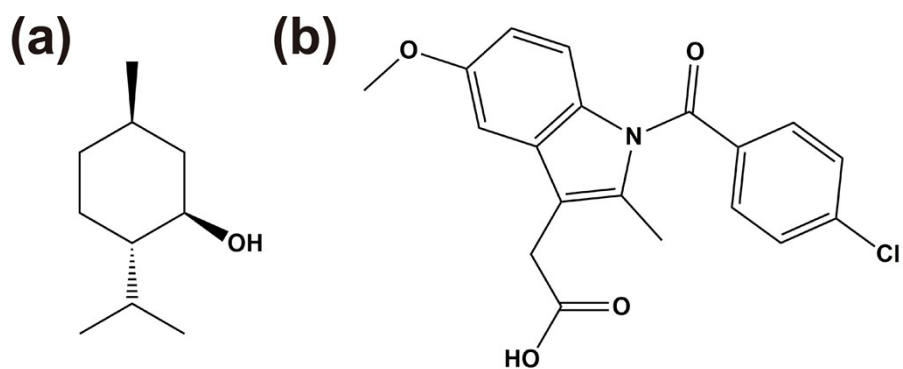

**Fig. S1.** Chemical structures of L-menthol (a) and indomethacin (b).

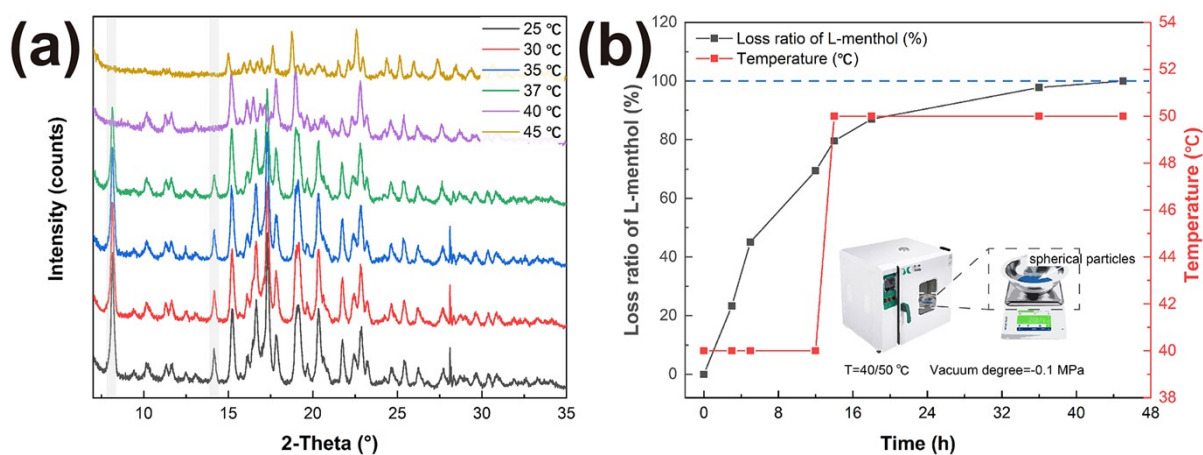

**Fig. S2.** (a) In situ Powder X-ray Diffraction results of spherical co-agglomerates at different temperatures. (b) The variation curve of loss ratio of L-menthol in spherical co-agglomerates with time at different temperature.

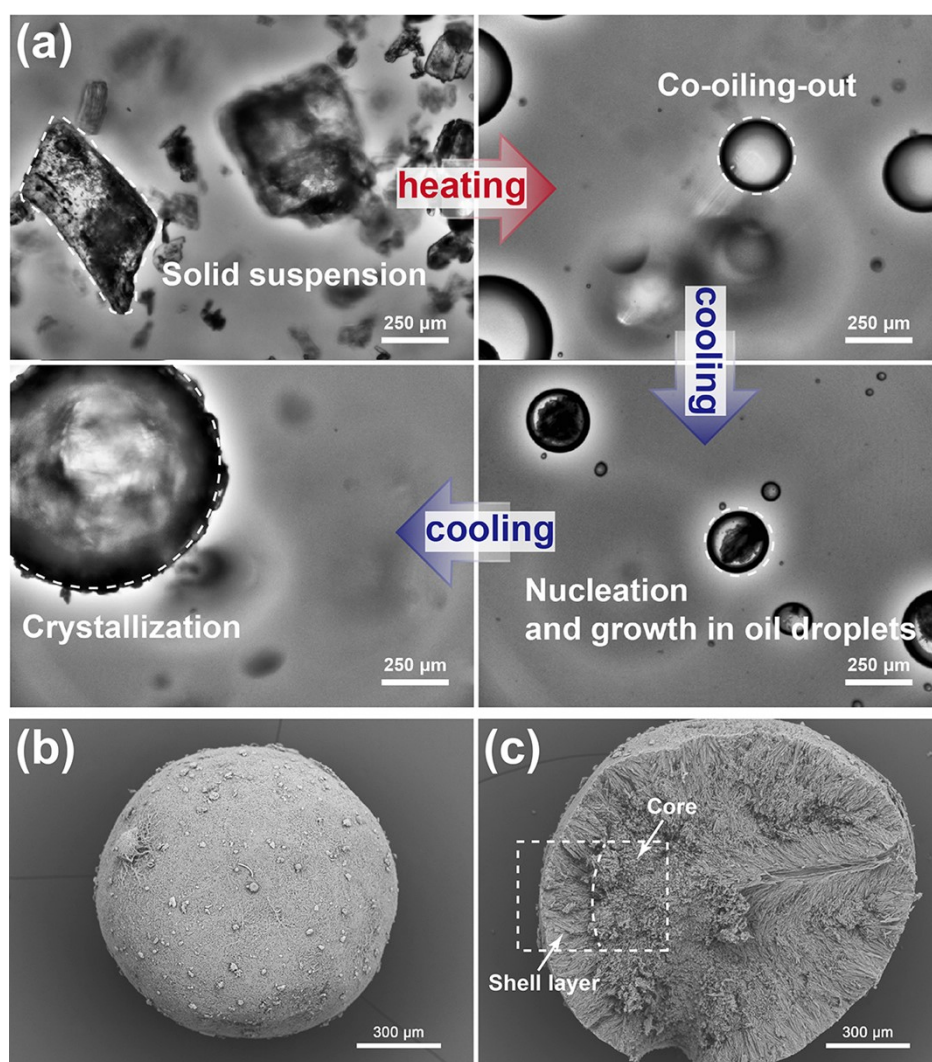

**Fig. S3.** (a) *In-situ* microscope images recorded during the oiling-out directional agglomeration process. Scanning electron microscopy images of the outside morphology (b) and cross section (c) of the spherical co-agglomerates.

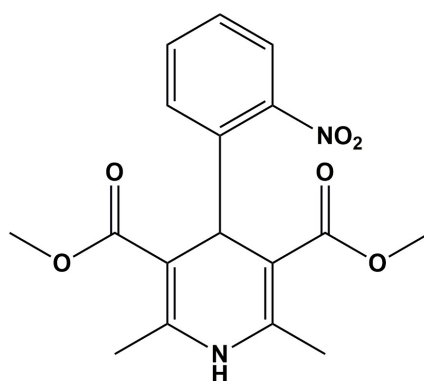

**Fig. S4.** Chemical structures of nifedipine.

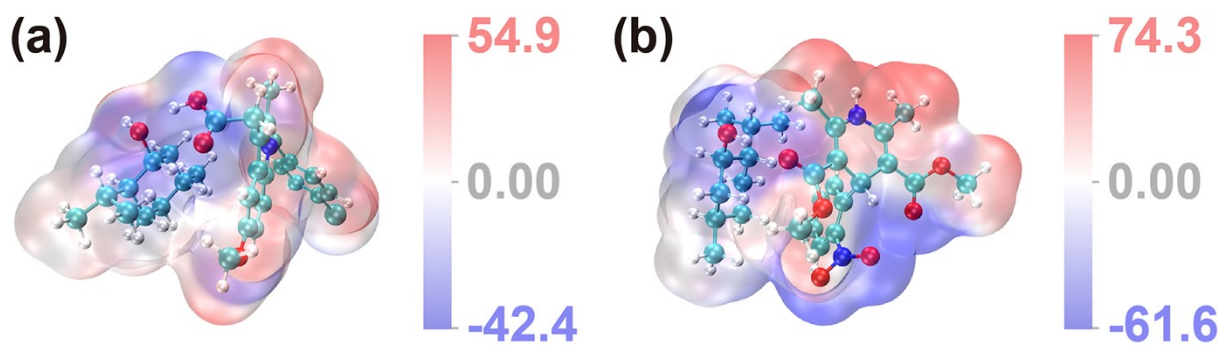

**Fig. S5.** Results of molecular electrostatic potential surface simulations for the dimeric configurations (most stable in water) of L-menthol-indomethacin (a) and L-menthol-nifedipine (b).

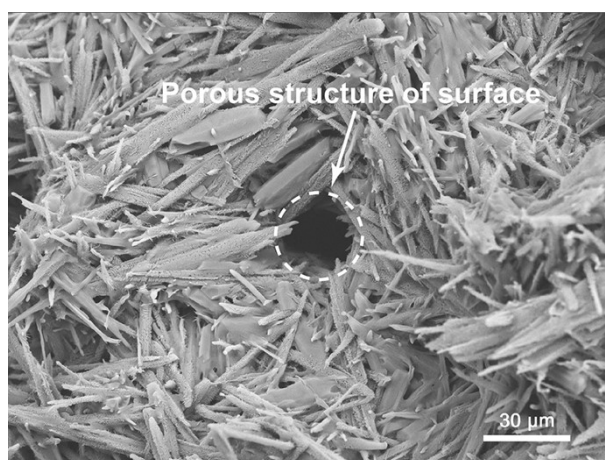

**Fig. S6.** Scanning electron microscopy image of composite particle surface.

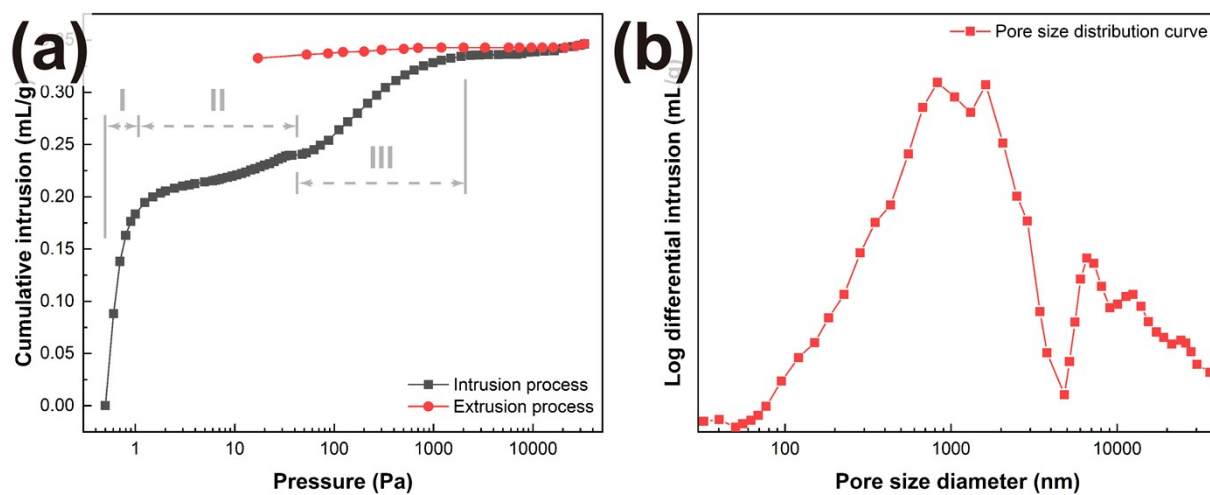

**Fig. S7.** (a) Mercury intrusion and extrusion curves. (b) Pore size distribution results.

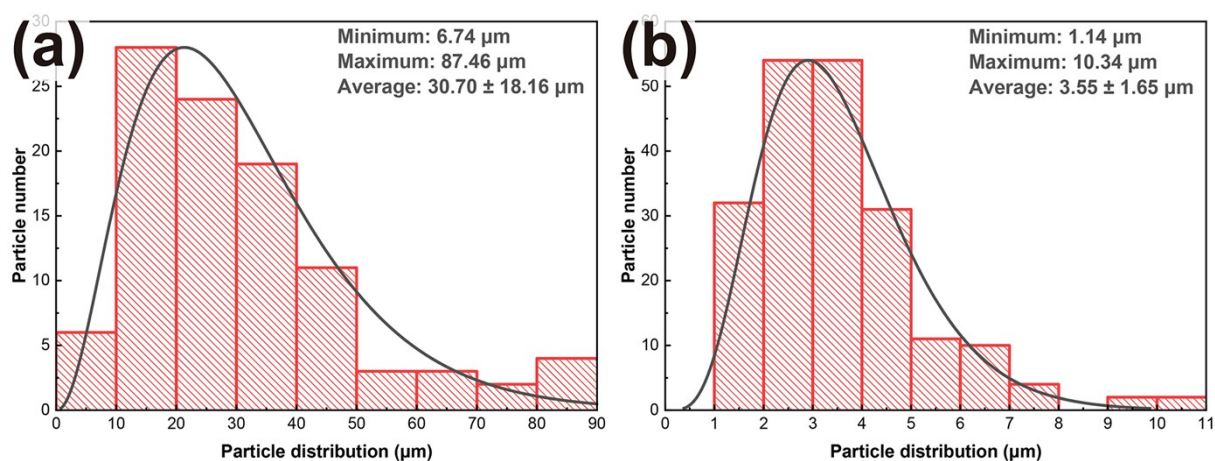

**Fig. S8.** Particle size distribution results of shell layer (a) and core (b) of composite particles.

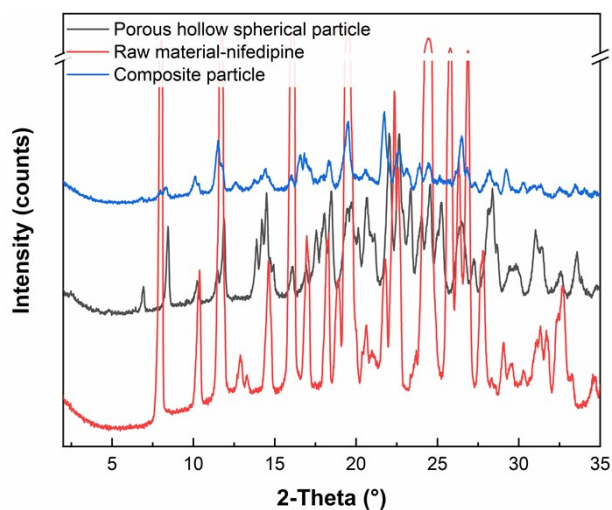

**Fig. S9.** Powder X-ray Diffraction results of composite particles.

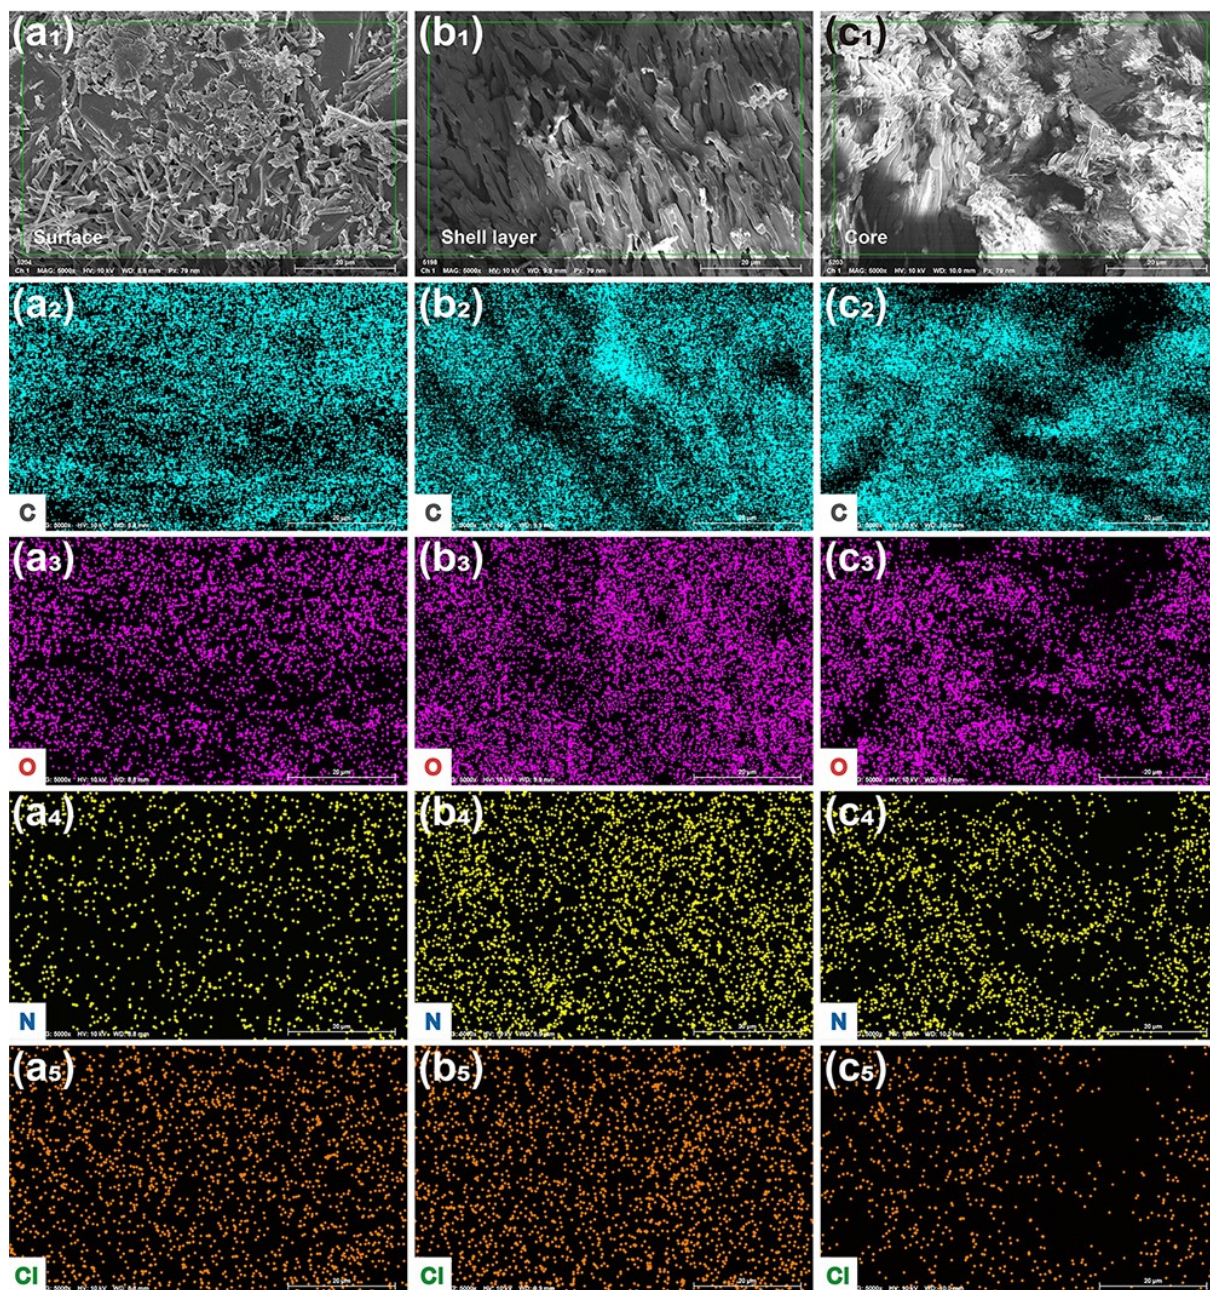

**Fig. S10.** Distribution of carbon, oxygen, nitrogen and chlorine elements at the surface (a), shell layer (b) and core (c) of composite particles.

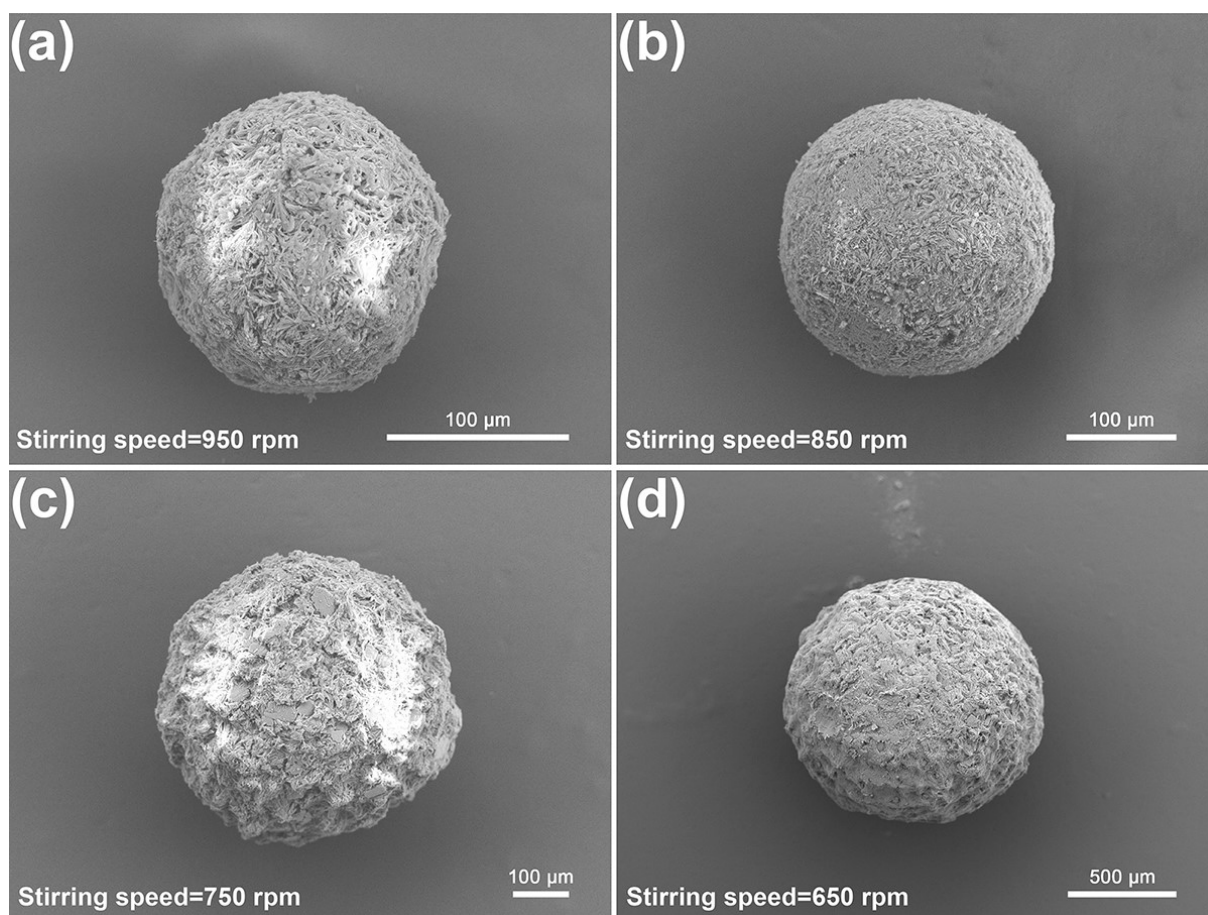

**Fig. S11.** Scanning electron microscopy images of composite particles at different stirring speeds. (a) 950 rpm. (b) 850 rpm. (c) 750 rpm. (d) 650 rpm.

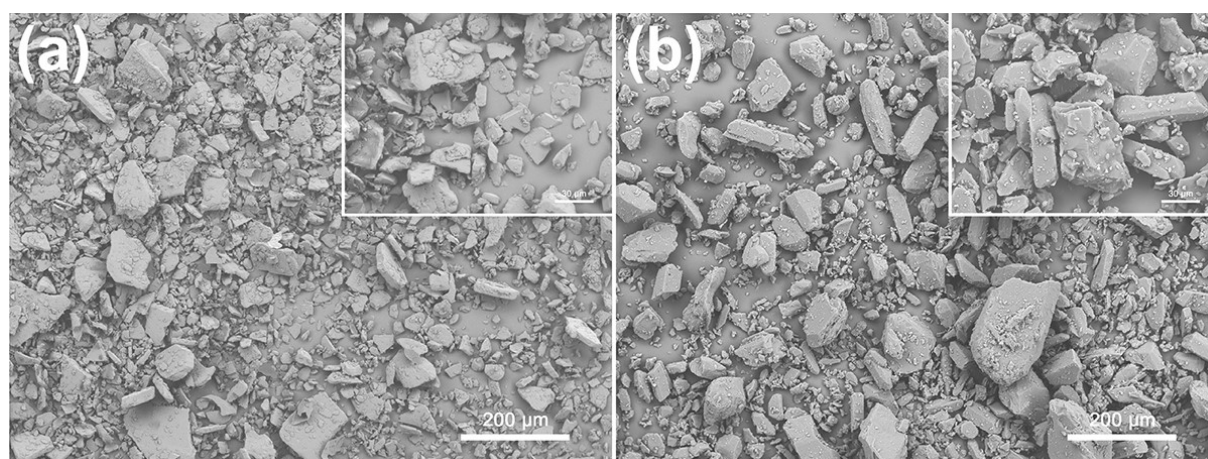

**Fig. S12.** Scanning electron microscopy images of commercial raw materials for indomethacin (a) and nifedipine (b).

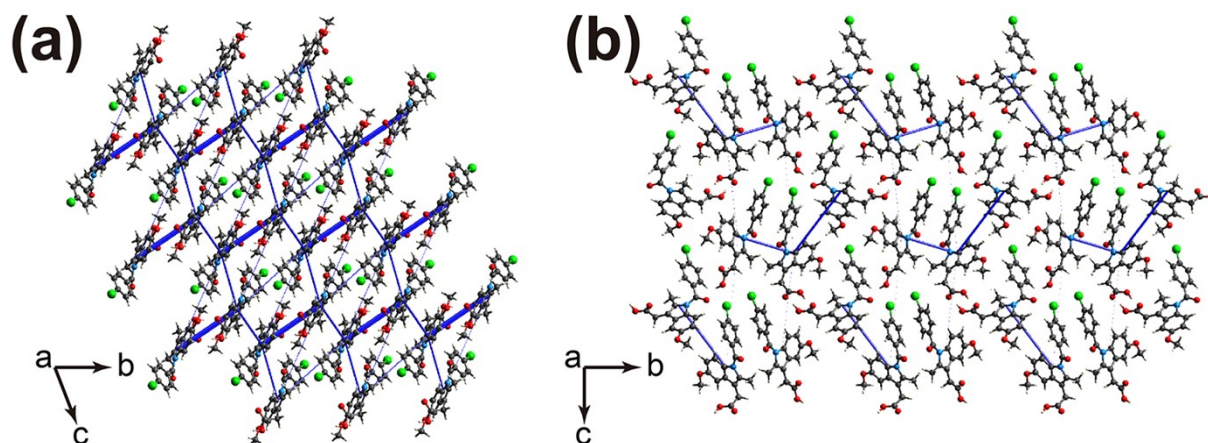

**Fig. S13.** Schematic diagram of the energy frameworks of indomethacin. (a)  $\gamma$  form. (b)  $\alpha$  form. Molecular packing structure viewed along the  $a$ -axis.

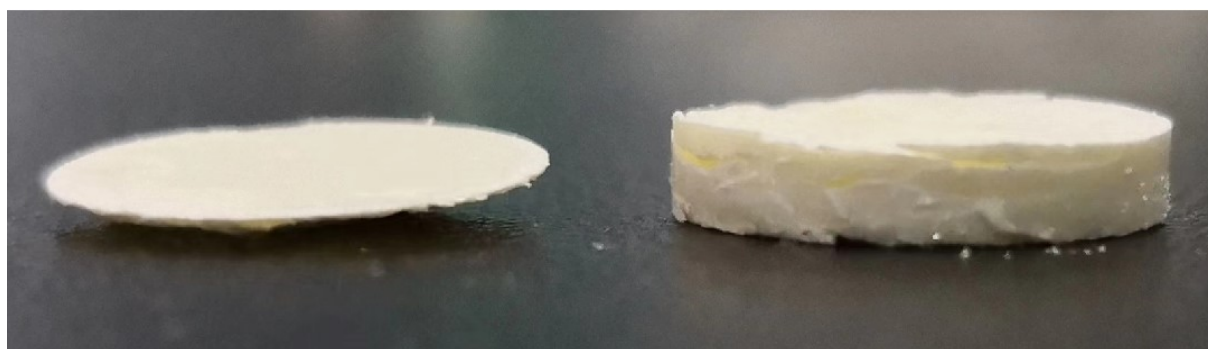

**Fig. S14.** The appearance of the tablet after the capping has occurred (the missing part above the tablet is shown on the left.).

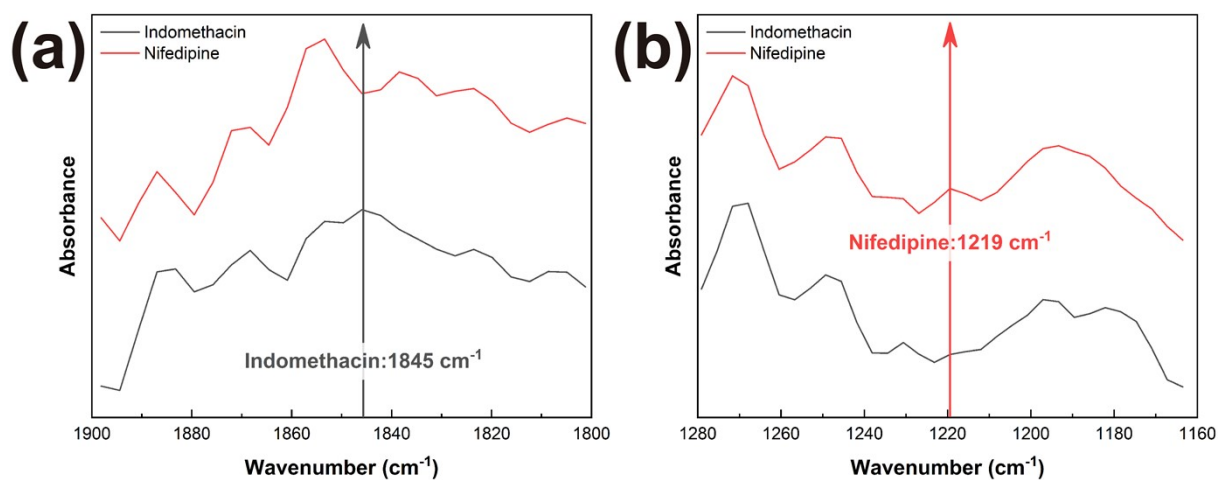

**Fig. S15.** Solvent-background-subtracted spectra of indomethacin and nifedipine in aqueous solution of ethanol. (a) 1800  $\text{cm}^{-1}$ -1900  $\text{cm}^{-1}$ . (b) 1160  $\text{cm}^{-1}$ -1280  $\text{cm}^{-1}$ .

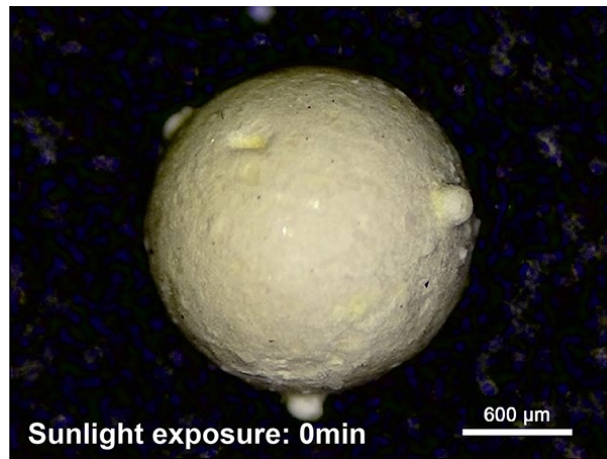

**Fig. S16.** Stereoscopic microscope photos of composite particles.
